# Supplementary material for: MCF-7 Human Breast Cancer Cells Form Differentiated Microtissues in Scaffold-Free Hydrogels
Source: PubMed Central journal article supplement (PMC4534042; doi:10.1371/journal.pone.0135426), 2015-08-12
Supplement: pone.0135426.s002.pdf [file pone.0135426.s002.pdf]

| <b>Protein</b>                                           | <b>Abbreviation</b> | <b>Primary Antibody</b> | <b>Primary Dilution</b> | <b>Secondary Antibody</b> | <b>Secondary Dilution</b> |
|----------------------------------------------------------|---------------------|-------------------------|-------------------------|---------------------------|---------------------------|
| Milk fat globule-EGF factor 8                            | MFGE8               | Abcam #ab17787          | 1:2000                  | AlexaFluor #A11001        | 1:500                     |
| Mucin 1                                                  | MUC1                | Abcam #ab15481          | 1:1000                  | AlexaFluor #A11008        | 1:500                     |
| Trans-acting T-cell-specific transcription factor GATA-3 | GATA3               | Cell Signaling #5852    | 1:500                   | AlexaFluor #A11008        | 1:500                     |
| Keratin 8                                                | KRT8                | Abcam #ab9023           | 1:100                   | AlexaFluor #A11001        | 1:500                     |
| Keratin 5                                                | KRT5                | Abcam #ab24647          | 1:100                   | AlexaFluor #A11008        | 1:500                     |
| E-cadherin                                               | CDH1                | BD #610181              | 1:500                   | AlexaFluor #A11001        | 1:500                     |
| GM130                                                    | GM130               | Cell Signaling #12480   | 1:500                   | AlexaFluor #A11008        | 1:500                     |
| Human Disc Large                                         | hDlg                | Santa Cruz Sc-9961      | 1:200                   | AlexaFluor #A11001        | 1:500                     |
| Vimentin                                                 | VIM                 | Sigma Aldrich V6630     | 1:200                   | AlexaFluor #A11008        | 1:500                     |
