# Supplementary material for: MCF-7 Human Breast Cancer Cells Form Differentiated Microtissues in Scaffold-Free Hydrogels
Source: PubMed Central journal article supplement (PMC4534042; doi:10.1371/journal.pone.0135426), 2015-08-12
Supplement: pone.0135426.s003.pdf [file pone.0135426.s003.pdf]

| <b>Protein</b>                              | <b>Abbreviation</b> | <b>Primary Antibody</b> | <b>Primary Dilution</b> | <b>Secondary Antibody</b> | <b>Secondary Dilution</b> |
|---------------------------------------------|---------------------|-------------------------|-------------------------|---------------------------|---------------------------|
| Snail family zinc finger 1                  | SNAI1               | Cell Signaling<br>#3879 | 1:500                   | Cell Signaling<br>#7074   | 1:1000                    |
| Wnt-induced signaling protein<br>2          | WISP2               | Abcam<br>#ab38317       | 1:500                   | Cell Signaling<br>#7076   | 1:1000                    |
| Milk fat globule-EGF factor 8               | MFGE8               | Abcam<br>#ab17787       | 1:2000                  | Cell Signaling<br>#7076   | 1:1000                    |
| Mucin 1                                     | MUC1                | Abcam<br>#ab15481       | 1:1000                  | Cell Signaling<br>#7074   | 1:1000                    |
| Vimentin                                    | VIM                 | Sigma<br>#V6630         | 1:1000                  | Cell Signaling<br>#7076   | 1:1000                    |
| Amphiregulin                                | AREG                | Abcam<br>#ab180722      | 1:1000                  | Cell Signaling<br>#7074   | 1:1000                    |
| Glyceraldehyde 3-phosphate<br>dehydrogenase | GAPDH               | Cell Signaling<br>#2118 | 1:5000                  | Cell Signaling<br>#7074   | 1:5000                    |
